# Supplementary material
Source: PubMed Central journal article supplement (PMC4944221)
Supplement: JB.00229-16_zjb999094113so4.pdf [file JB.00229-16_zjb999094113so4.pdf]

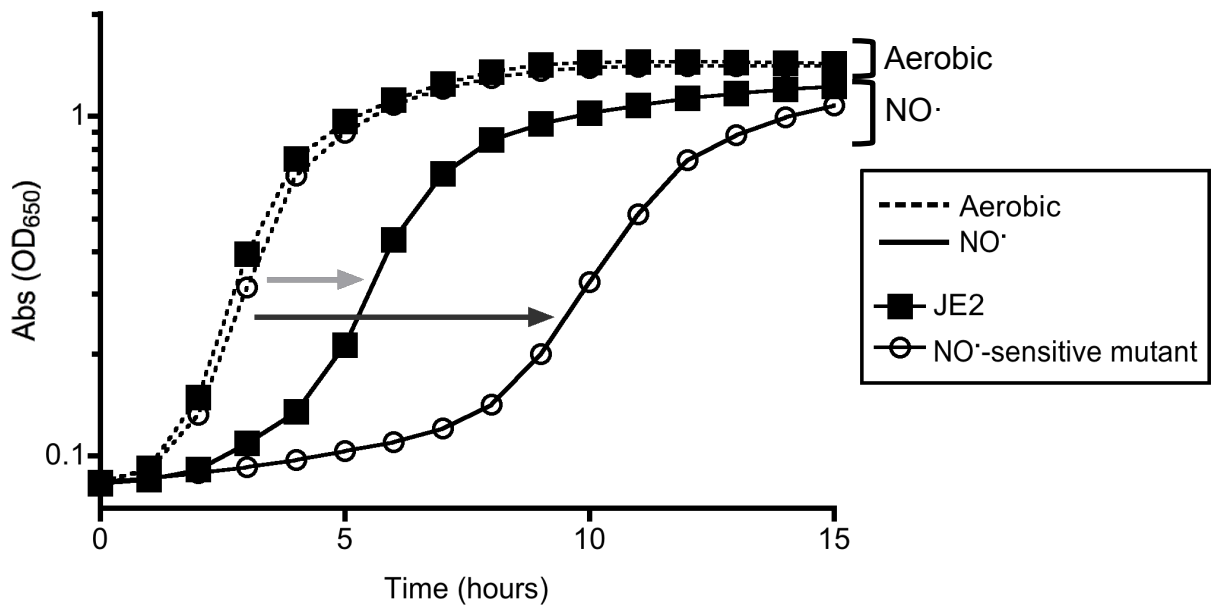

**Figure S1. NO· addition at the time of inoculum extends the lag time of *S. aureus* JE2.** *S. aureus* JE2 WT and mutants were grown in LB aerobically (dotted lines) and following exposure to 5mM DETA/NO at the time of inoculum (solid lines). NO· extends the lag time of WT JE2 by approximately 3-hrs (light gray arrow). Mutants with significantly extended lag times only when NO· is present (dark gray arrow) are NO·-sensitive

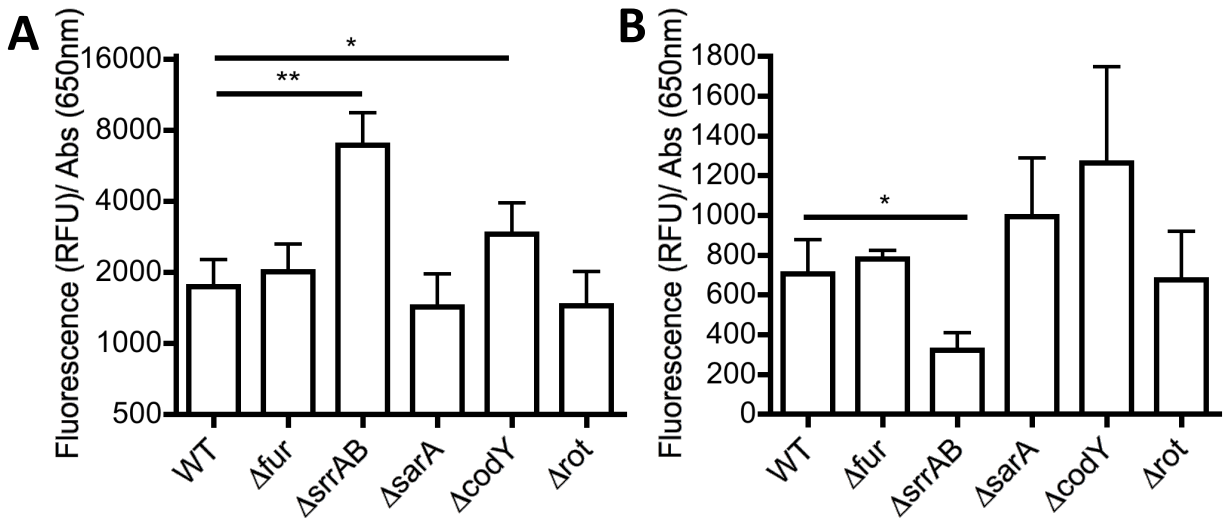

**Figure S2. Expression of NO $\cdot$ -resistance genes *hmp* and *ldh1* in NO $\cdot$ -sensitive regulator mutants.** Newman mutants harboring plasmids containing a transcriptional fusion of *gfp* to the promoter of either A) *ldh1* or B) *hmp* were grown in PNG and exposed to 2mM DETA/NO at an OD<sub>650</sub> of 0.2. Shown is the peak value of relative fluorescence units (RFU) per OD<sub>650</sub> of NO $\cdot$ -exposed cells minus the RFU/OD<sub>650</sub> of aerobically grown cells. (n=3, error bars show SEM). Significance was calculated using a Student's two-sided t test (\*, P  $\leq$  0.05; \*\*, P  $\leq$  0.01).

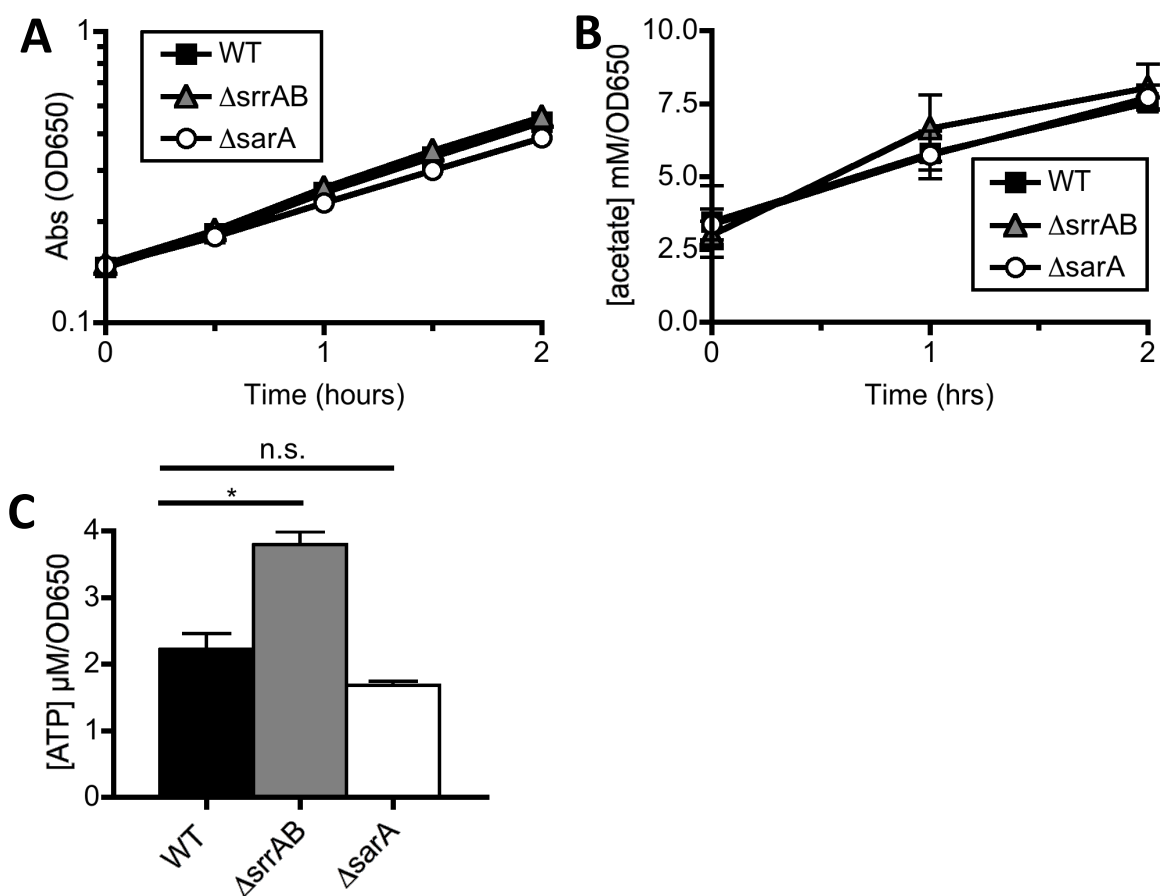

**Figure S3.  $\Delta srrAB$  and  $\Delta sarA$  mutants exhibit normal acetogenesis and ATP levels during aerobic growth.** A) Growth, (B) acetate production, and (C) ATP levels of *S. aureus* COL WT,  $\Delta srrAB$ , and  $\Delta sarA$  during aerobic growth in PNG (n=3). Significance was calculated using a two-sided Student's t-test ( $P \leq 0.05$ ).

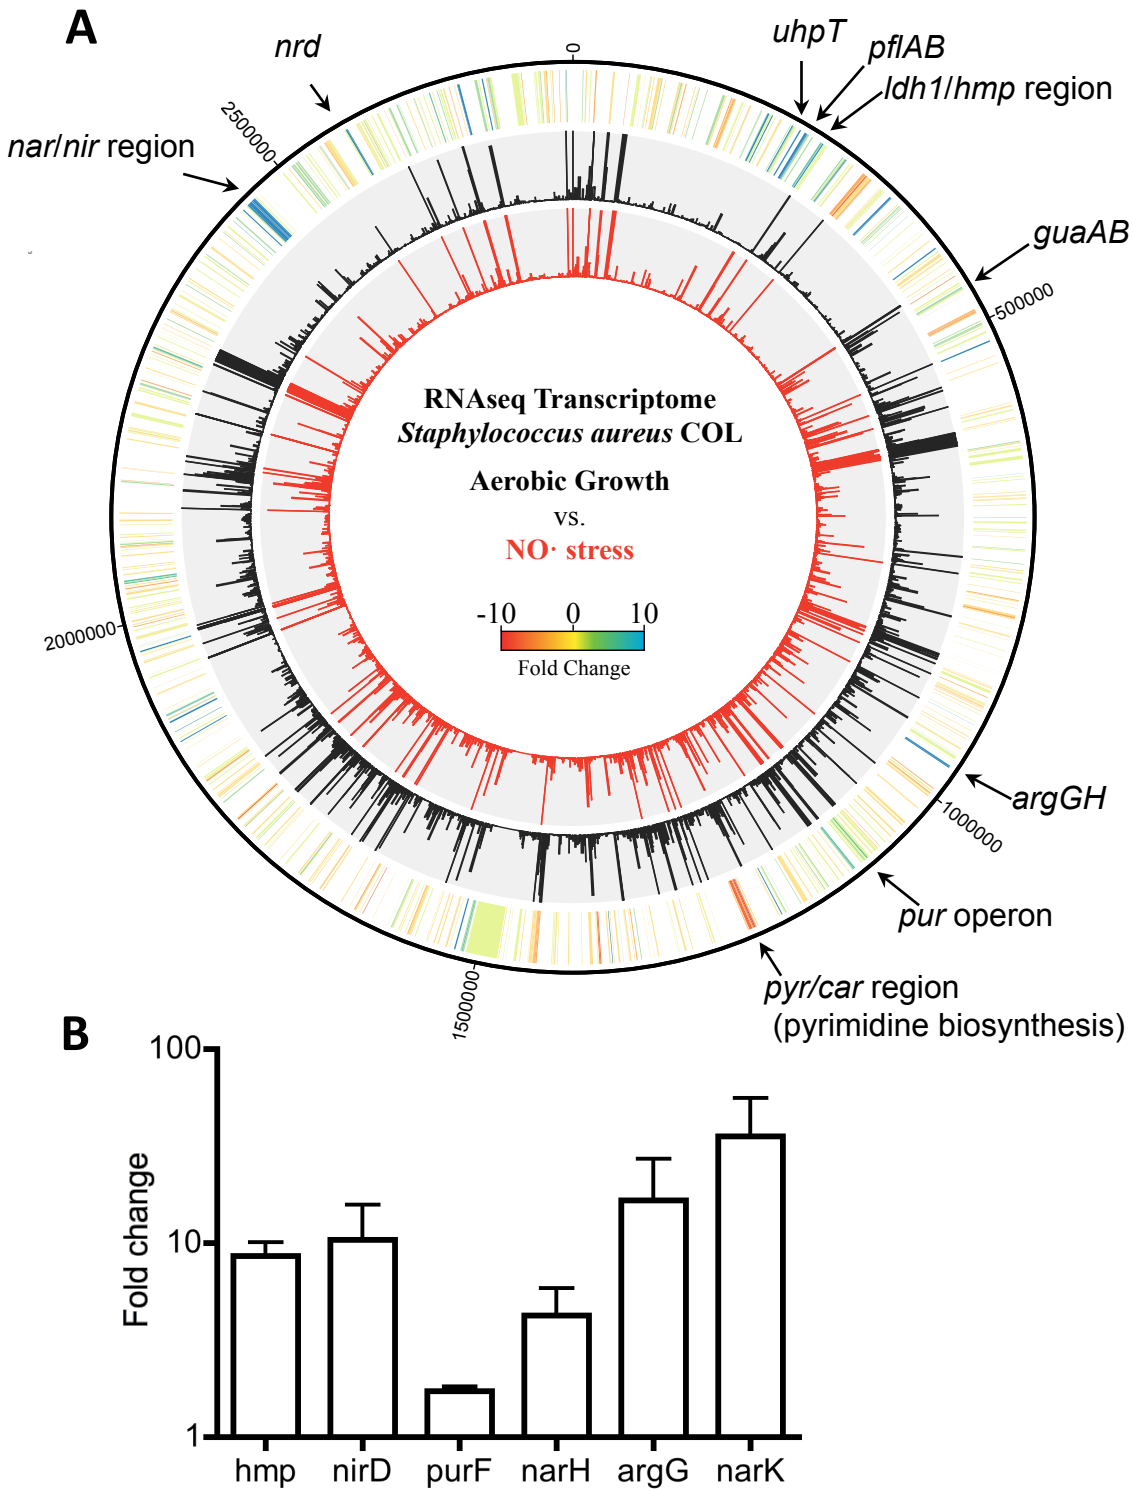

**Figure S4. NO· induces a massive transcriptional response in *S. aureus* COL.** (A) Genomic map showing transcription profiles of *S. aureus* COL grown in PNG either aerobically (middle black circle) or for 1-hr in the presence of 4mM DETA/NO (inner red circle). The outer yellow circle is a heat map depicting fold change differences in expression for the NO· exposed versus aerobically grown cells. (B) qRT-PCR data verifying the NO· responsiveness of a subset of genes identified as NO· inducible by RNA-Seq. Graph depicts the fold change in expression levels for NO·-exposed cells compared to cells grown aerobically (n=3, error bars show SEM).

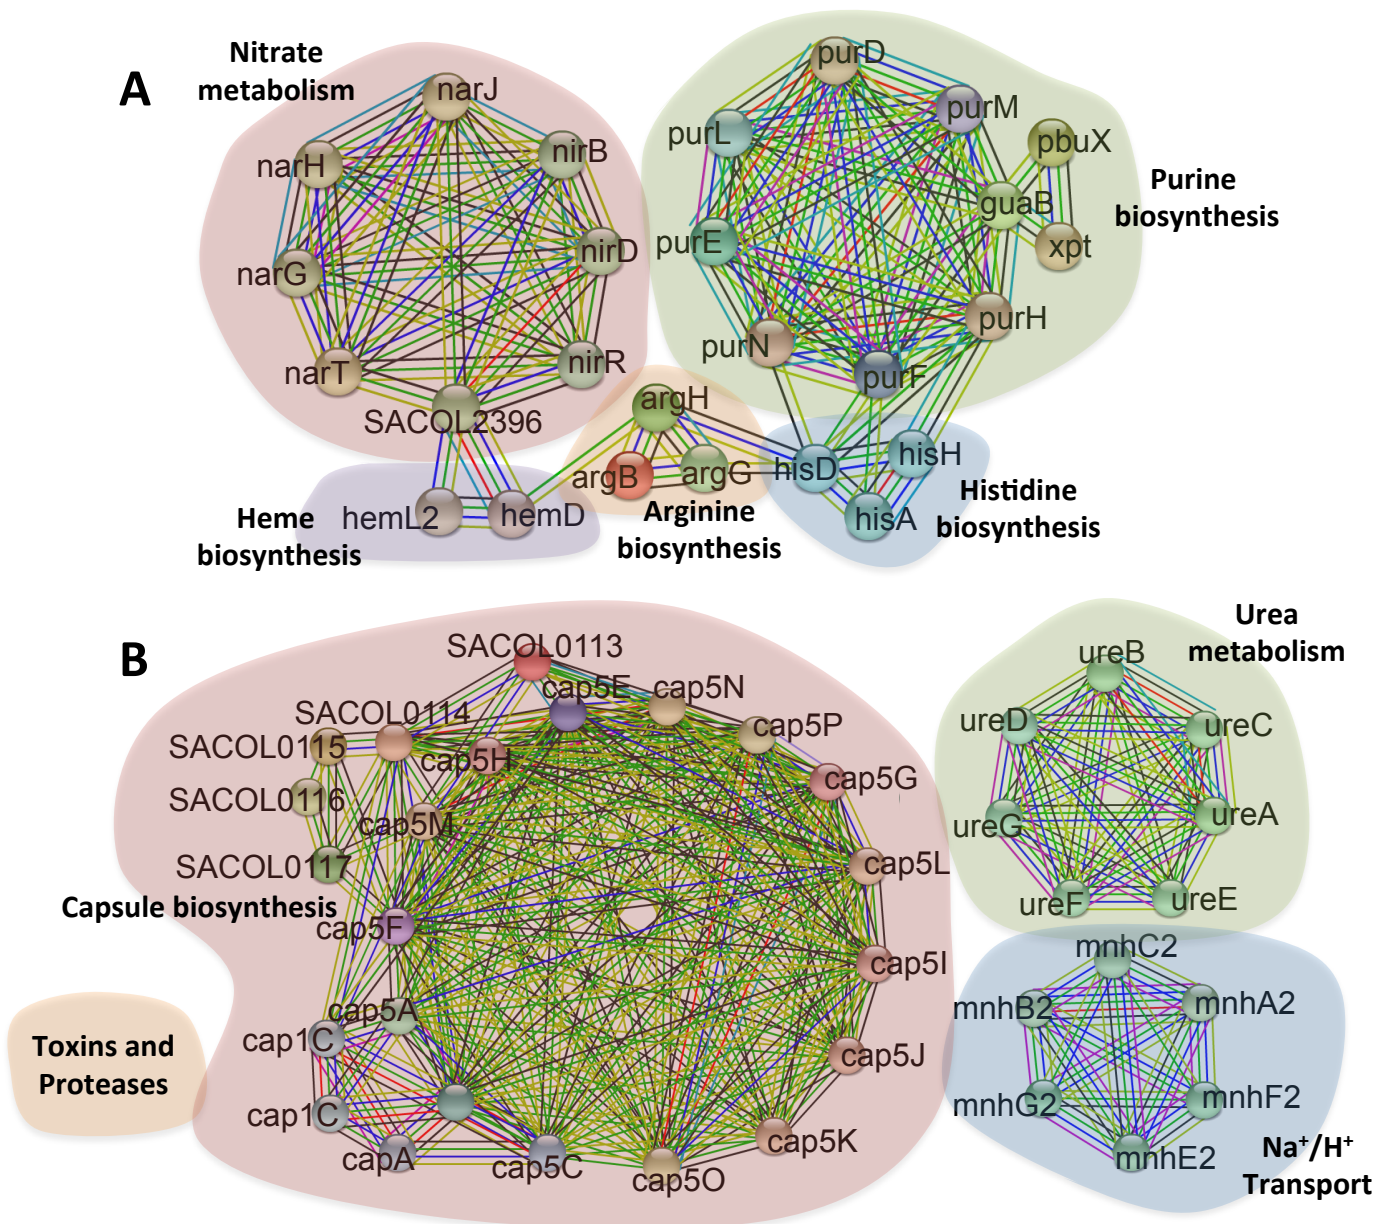

**Figure S5. Associations among genes identified as having differential expression in the  $\Delta sarA$  mutant compared to WT following NO<sub>2</sub>-exposure.** Genes that were (A) underexpressed (<2-fold) or (B) overexpressed (>2-fold) in the NO<sub>2</sub>-exposed  $\Delta sarA$  mutant compared to NO<sub>2</sub>-exposed WT were examined for gene/protein associations using the Search Tool for the Retrieval of Interacting Genes/Proteins (STRING) v10, high confidence setting. Each line represents a different association between genes. For clarity, only the most prominent clusters of predicted gene/protein associations are shown.

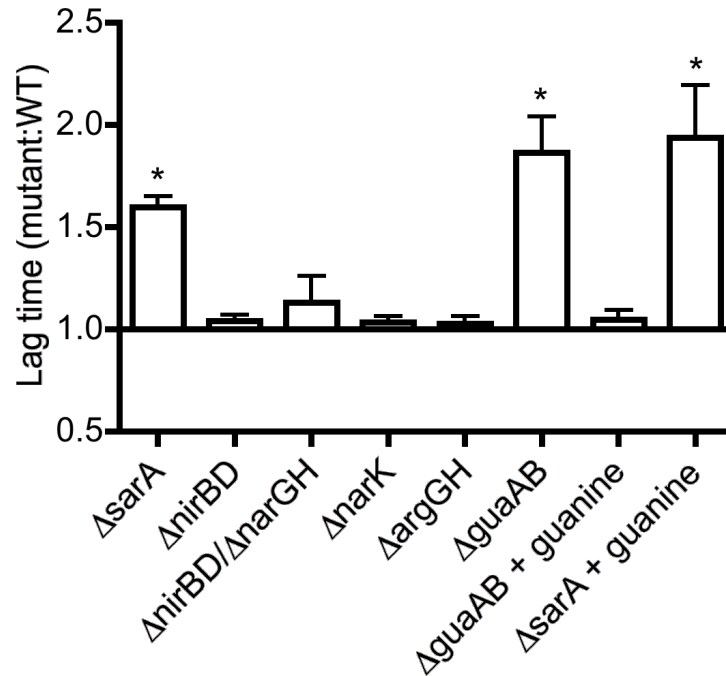

**Figure S6. Select genes that are under-expressed in the NO<sup>•</sup>-exposed ΔsarA mutant are not individually required for NO<sup>•</sup> resistance.** *S. aureus* Newman mutants were grown in LBGT media with or without the addition of 5mM DETA/NO at the time of inoculum. Lag time (time to OD<sub>650</sub> 0.2) for each NO<sup>•</sup>-exposed strain was normalized to its aerobic lag time. Graphs depict the ratio of mutant to WT lag times (n=3, error bars show SEM). Significance was calculated using a two-sided Student's t-test to compare each mutant lag time to WT lag time (\*, P ≤ 0.05).
